# Supplementary material
Source: publisher figshare collection journal article supplement (https://aacr.figshare.com/articles/dataset/_/22489020)

Figure S1. No significant change was observed in LVEF at baseline and after treatment ( $p=0.669$ , Kruskal-Wallis rank sum test).

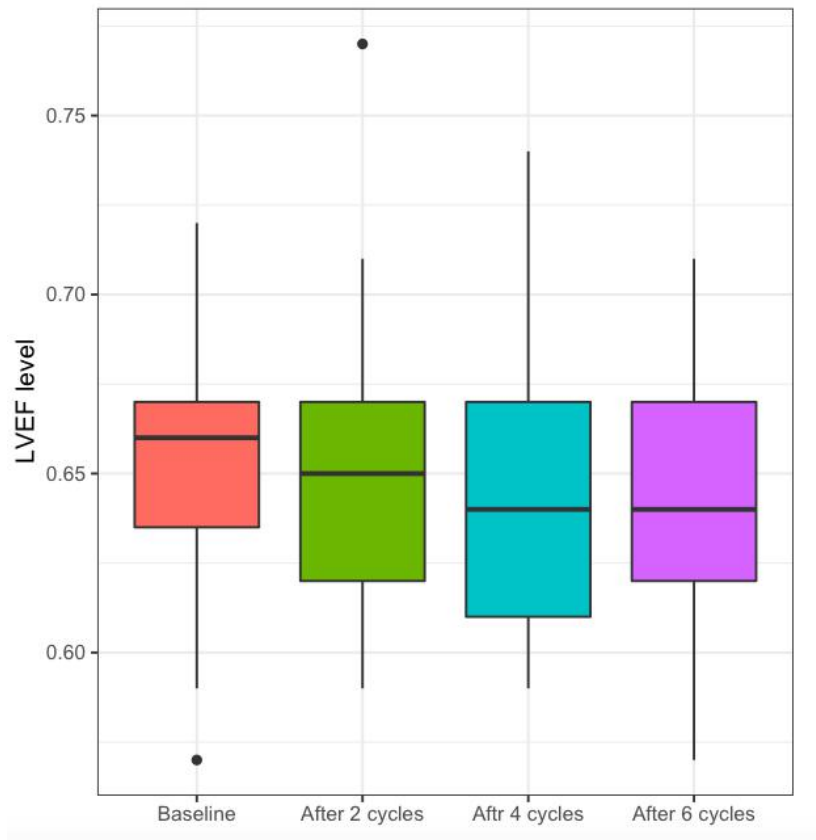

Supplement: Supplementary file 1 [file 39940641]
